# Supplementary material for: Nucleolar activity and CENP-C regulate CENP-A and CAL1 availability for centromere assembly in meiosis
Source: Oxford University Press journal article supplement (doi:10.1242/dev.130625), 2016-04-15
Supplement: dev130625supp.pdf [file dev130625supp.pdf]

Supplemental Figures

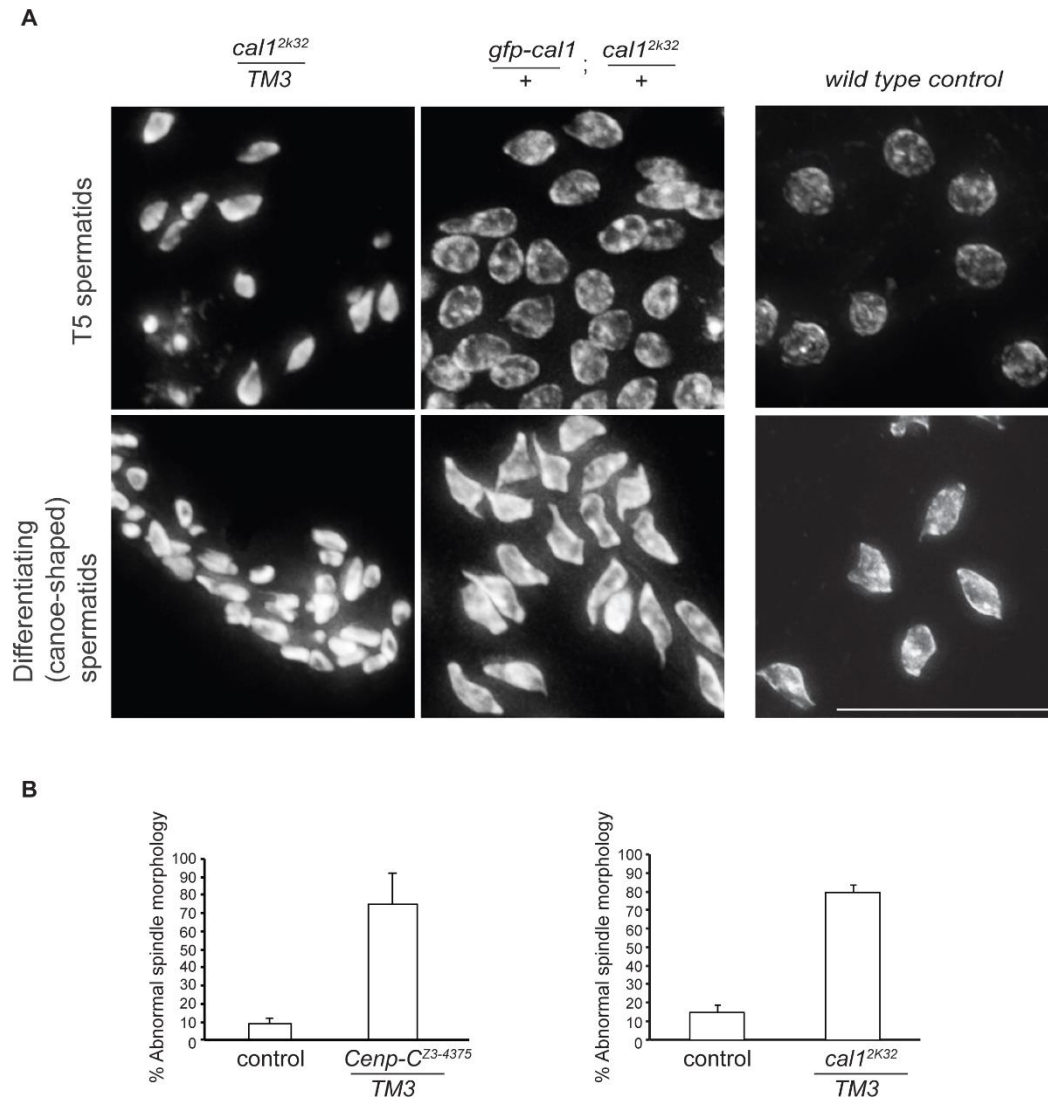

**Figure S1 (related to Figure 1):**

**A: Introduction of GFP-tagged CAL1 into  $cal1^{2k32}$  mutants rescues defects in spermatid nuclear morphology.**

$cal1^{2k32}$  heterozygous adult testes (left) or  $cal1^{2k32}$  heterozygous adult testes expressing an extra copy of GFP-tagged CAL1 on chromosome 2 (middle), fixed and stained with DAPI showing spermatid nuclei at T5 and canoe-shaped stages (grey). Typical morphologies of wild type control T5 and canoe-shaped spermatids are shown for comparison (right). Scale bar 20  $\mu$ m.

**B:  $Cenp-C^{Z3-4375}$  and  $cal1^{2k32}$  mutants have defective meiotic spindle morphology.**

Quantitation of control (wild type),  $Cenp-C^{Z3-4375}/TM3$  (left) or  $cal1^{2k32}/TM3$  (right) spermatocytes with abnormal spindle morphology in meiosis I (prometaphase to telophase, M1 to M5) and II (prometaphase to telophase, M6 to M11), as determined by tubulin staining, expressed as a percentage of total number of nuclei analysed (n=100). Error bars = SD.

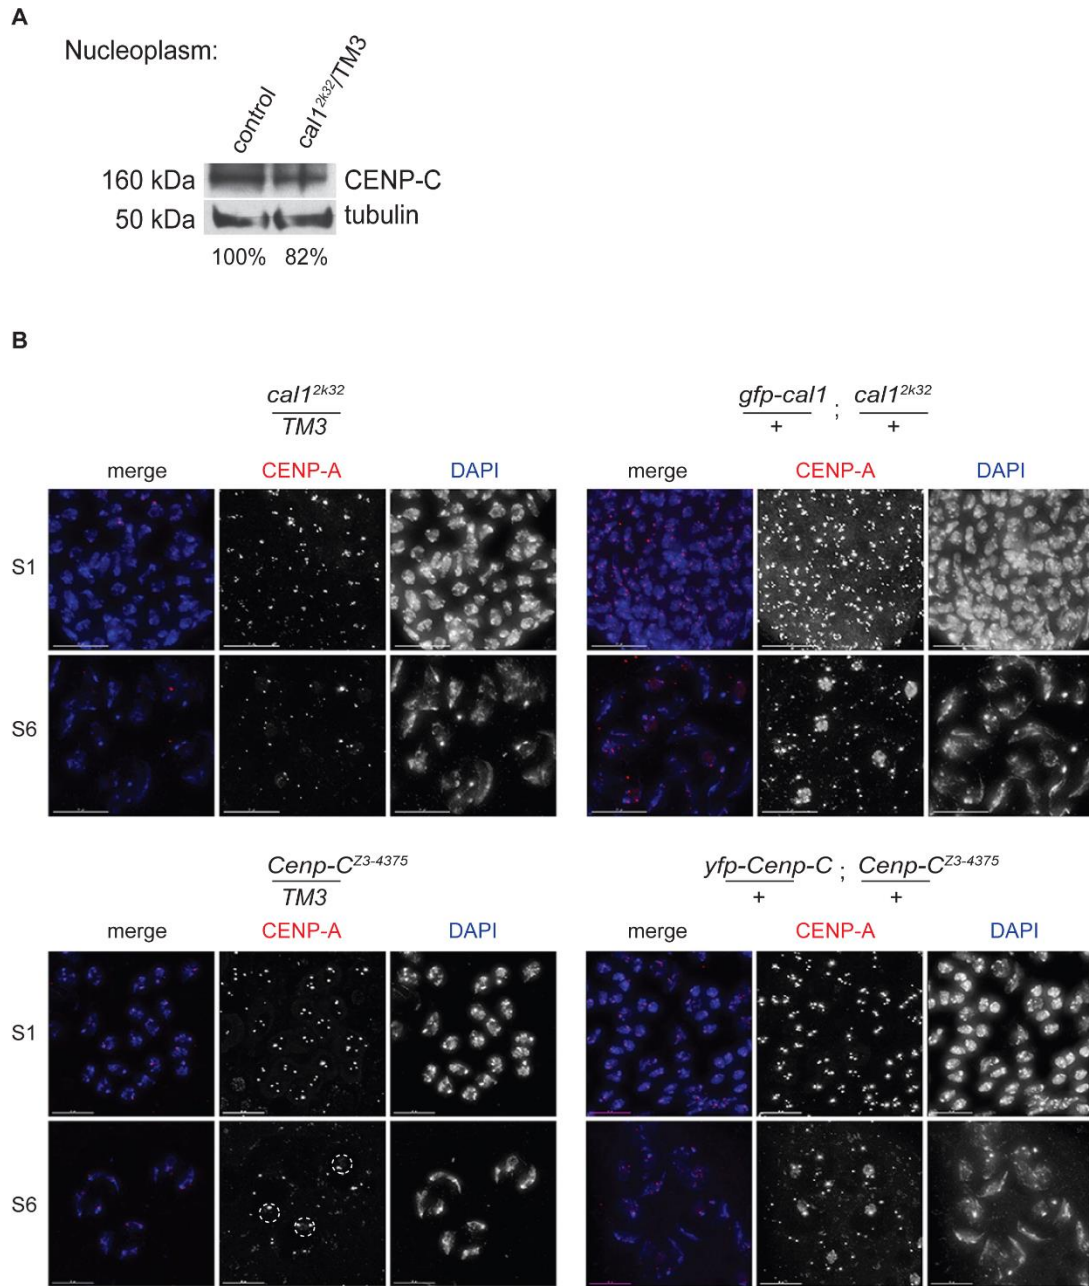

**Figure S2 (related to Figure 2):**

**A: Nucleoplasmic CENP-C level is decreased in *cal1<sup>2k32</sup>* mutant larval testes.**

Western blotting of nucleoplasmic extracts from control (*wild type*) and *cal1<sup>2k32</sup>/TM3* larval testes probed with anti-CENP-C antibody and anti-tubulin as loading control. Molecular weights (kDa) are indicated. Quantitation (normalized to control) shows that CENP-C level in *cal1<sup>2k32</sup>* mutant testes is 82% of wild type level.

**B: Introduction of YFP-tagged CENP-C into *Cenp-C<sup>Z3-4375</sup>* mutants or GFP-tagged CAL1 into *cal1<sup>2k32</sup>* mutants rescues defects in CENP-A assembly in meiotic prophase I.**

Top: *cal1<sup>2k32</sup>* heterozygous testes or *cal1<sup>2k32</sup>* heterozygous testes expressing an extra copy of GFP-tagged CAL1 on chromosome 2, fixed and stained with anti-CENP-A (red) and DNA is stained with DAPI (blue). Individual crosses were performed two times. Representative images from prophase S1 and S6 stages are shown. Scale bar 20  $\mu$ m.

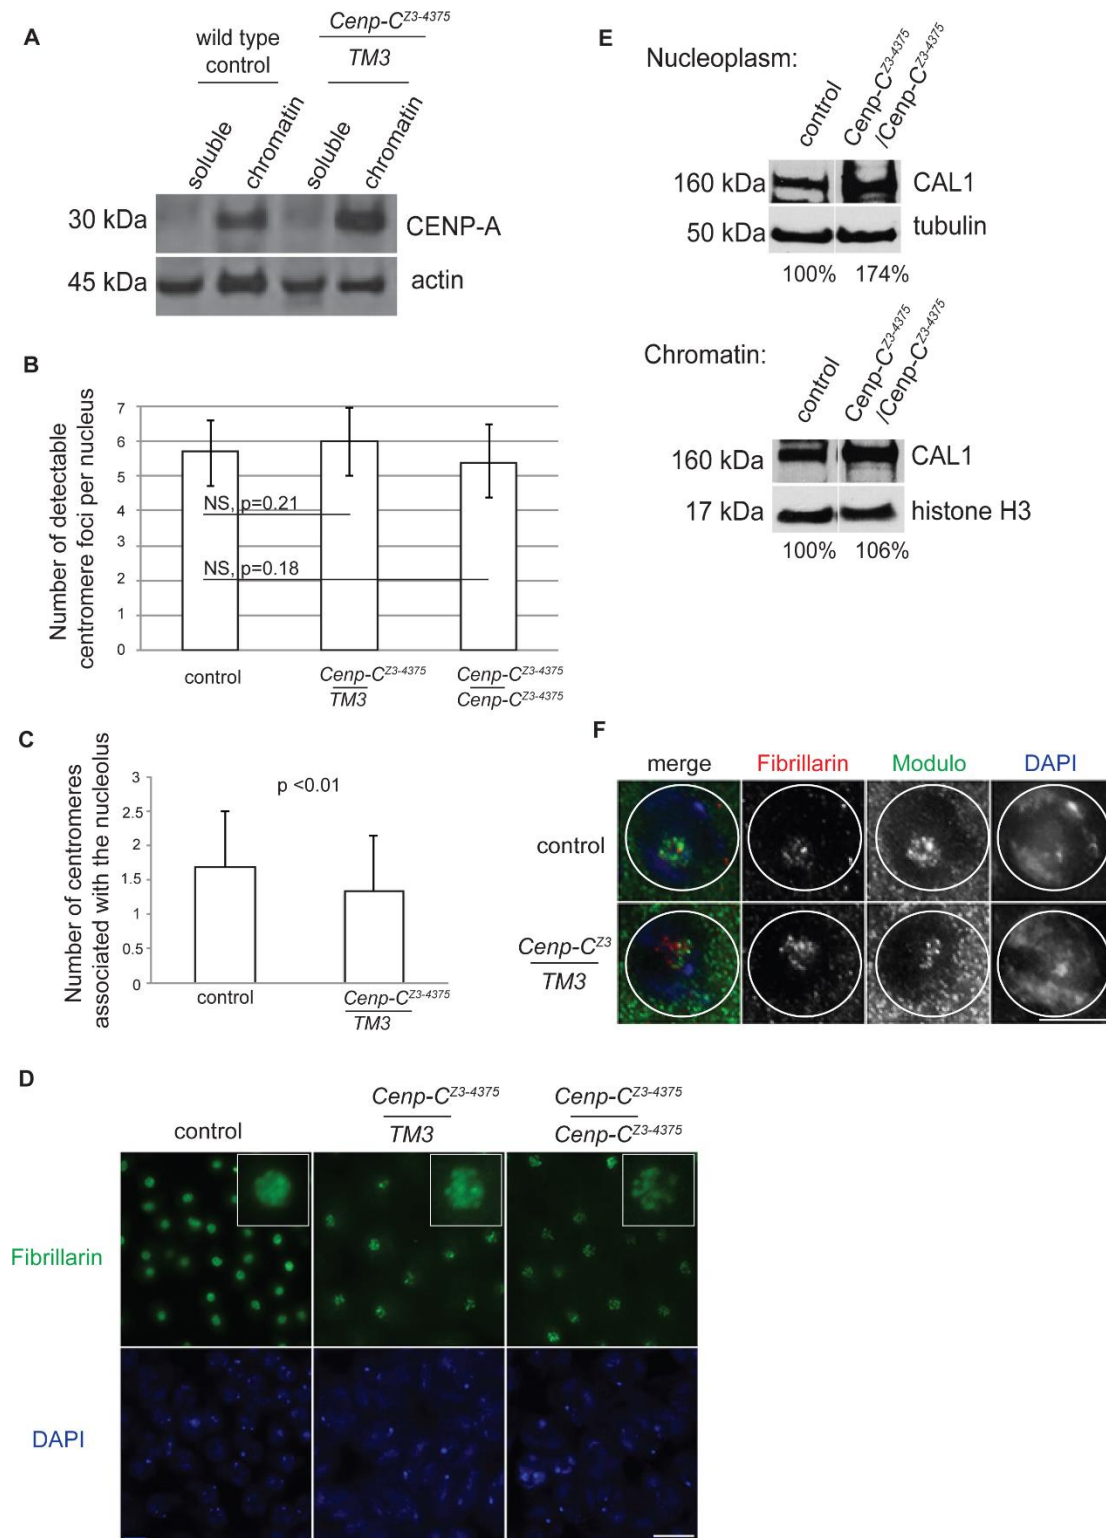

**Figure S3 (related to Figure 3):**

**A: Chromatin-associated CENP-A is increased in *Cenp-C<sup>Z3-4375</sup>* larval testes.**

Western blotting of soluble and chromatin-bound extracts from control (*wild type*) and *Cenp-C<sup>Z3-4375</sup>/TM3* larval testes probed with anti-CENP-A antibody and anti-actin antibody as loading control. Molecular weights (kDa) are indicated.

**B: No significant difference in the number of detectable centromeric foci in *Cenp-C*<sup>Z3-4375</sup> mutant spermatocytes compared to controls.**

Quantitation of number of detectable centromere foci (scored using CENP-A and CENP-C staining) in control (*wild type*), *Cenp-C*<sup>Z3-4375</sup>/*TM3* heterozygous or *Cenp-C*<sup>Z3-4375</sup>/*Cenp-C*<sup>Z3-4375</sup> homozygous prophase S6 nuclei (n=30). T test gave no significant difference compared to control (p=0.21 for heterozygotes and p=0.18 for homozygotes).

**C: Reduced number of centromeres associated with the nucleolus in *Cenp-C*<sup>Z3-4375</sup> S6 spermatocytes compared to wild type control.**

Quantitation of number of CENP-A foci associated with the nucleolar CENP-A pool in control (*wild type*) and *Cenp-C*<sup>Z3-4375</sup>/*TM3* spermatocytes (n=300 nuclei). T test gave significant difference (p< 0.01). Error bars = SD.

**D: Fibrillarin staining is disrupted in *Cenp-C*<sup>Z3-4375</sup> heterozygous and *Cenp-C*<sup>Z3-4375</sup> homozygous mutant spermatocytes.**

Control and *Cenp-C*<sup>Z3-4375</sup> heterozygous and homozygous S6 spermatocytes stained with antibodies against Fibrillarin (green) and DNA is stained with DAPI (blue). Scale bar 20  $\mu$ m. Insets show a single nucleolus from control or *Cenp-C*<sup>Z3-4375</sup> mutants, highlighting the typical Fibrillarin staining pattern observed.

**E: Chromatin-associated and nucleoplasmic CAL1 levels are increased in *Cenp-C*<sup>Z3-4375</sup> homozygous larval testes.**

Western blotting of nucleoplasmic and chromatin-bound extracts from control (*wild type*) and *Cenp-C*<sup>Z3-4375</sup>/*Cenp-C*<sup>Z3-4375</sup> larval testes probed with anti-CAL1 antibody and anti-tubulin or anti-histone H3 antibody as loading control. Molecular weights (kDa) are indicated. Quantitation (normalized to control) shows that nucleoplasmic CAL1 level in *Cenp-C*<sup>Z3-4375</sup> homozygous mutant testes is 174% of wild type level, whereas chromatin-bound CAL1 level in *Cenp-C*<sup>Z3-4375</sup> homozygous mutant testes is similar to wild type.

**F: Both Fibrillarin and Modulo staining is disrupted (reduced or more dispersed) in *Cenp-C* mutant S6 spermatocytes.**

Control and *Cenp-C*<sup>Z3-4375</sup>/*TM3* S6 spermatocytes stained with antibodies against Fibrillarin (red) and Modulo (green) and DNA is stained with DAPI. Scale bar 10  $\mu$ m.

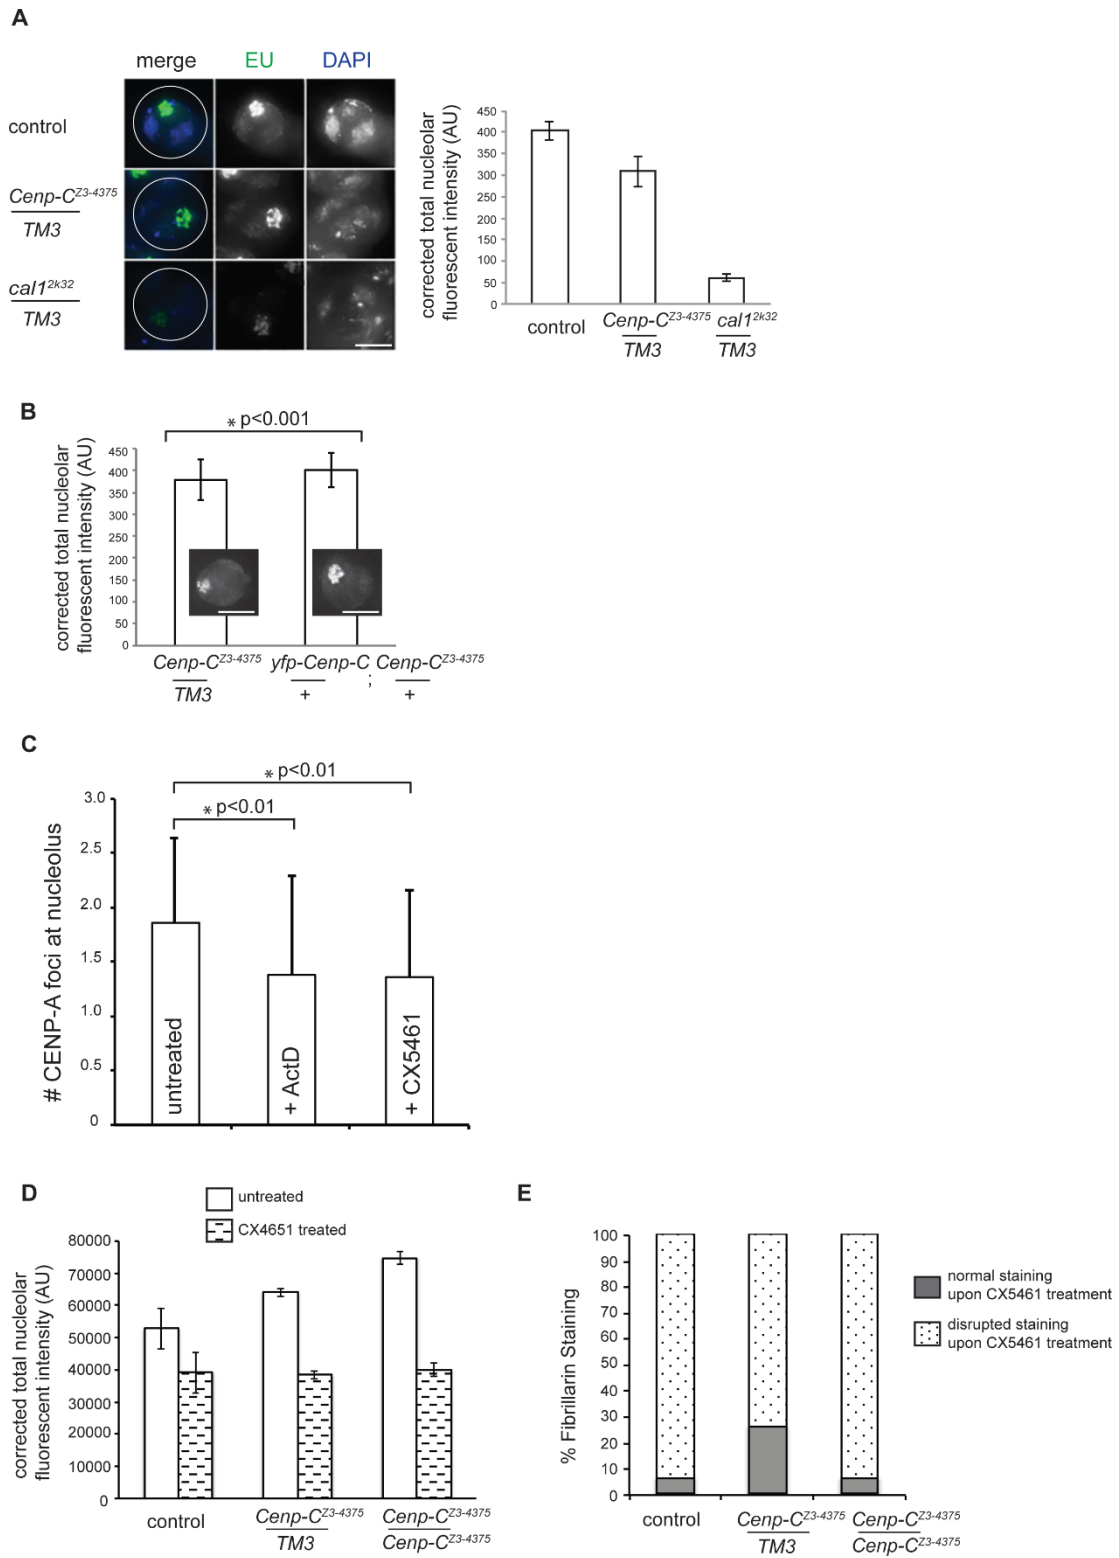

**Figure S4 (related to Figure 6):**

**A: Nucleolar transcription is reduced in *Cenp-C* and *cal1* mutants.**

Left: Control, *Cenp-C<sup>Z3-4375</sup>/TM3* and *cal1<sup>2K32</sup>/TM3* S6 spermatocytes pulsed labeled with EU (green), then fixed and DNA is stained with DAPI (blue). Scale bar 10  $\mu$ M. Right: Quantitation of nucleolar EU incorporation in control, *Cenp-C<sup>Z3-4375</sup>/TM3* and *cal1<sup>2K32</sup>/TM3* prophase I spermatocytes. Error bars = SD.

**B: Introduction of YFP-tagged CENP-C into *Cenp-C<sup>Z3-4375</sup>* mutants results in a significant increase in EU incorporation rate.**

Quantitation of nucleolar EU incorporation in *Cenp-C<sup>Z3-4375</sup>* heterozygous testes or *Cenp-C<sup>Z3-4375</sup>* heterozygous testes expressing an extra copy of YFP-tagged CENP-C on chromosome 2. T test gave a significant increase ( $p < 0.001$ ),  $n=50$  S6 spermatocytes. Error bars = SD. Representative images of EU incorporation (grey) in spermatocytes of indicated genotypes are shown. Scale bar 10  $\mu$ M.

**C: Reduced number of centromeres associated with nucleoli in wild type spermatocytes treated with Actinomycin D or CX5461.**

Quantitation of number of CENP-A foci associated with the nucleolus in wild type S6 spermatocytes untreated or treated with ActD or CX5461 ( $n=300$  nuclei). T test gave a significant difference in the number of centromeres tethered at nucleoli in untreated spermatocytes and those treated with ActD ( $p < 0.01$ ) or CX5461 ( $p < 0.01$ ). Error bars = SD.

**D: Intensity of the CENP-A pool is reduced in control and *Cenp-C<sup>Z3-4375</sup>* hetero- and homozygous S6 spermatocytes upon treatment with CX5461.**

Quantitation of CENP-A pool intensity (corrected total nucleolar fluorescent intensity, AU) in control, *Cenp-C<sup>Z3-4375</sup>/TM3* and *Cenp-C<sup>Z3-4375</sup>/Cenp-C<sup>Z3-4375</sup>* S6 spermatocytes ( $n=50$ ) untreated and after CX5461 treatment.

**E: Fibrillar staining is disrupted in control and *Cenp-C<sup>Z3-4375</sup>* hetero- and homozygous S6 spermatocytes upon treatment with CX5461.**

Quantitation of normal and disrupted Fibrillar staining in control, *Cenp-C<sup>Z3-4375</sup>/TM3* and *Cenp-C<sup>Z3-4375</sup>/Cenp-C<sup>Z3-4375</sup>* S6 spermatocytes ( $n=70$ ) untreated and after CX5461 treatment.
